# Supplementary material
Source: publisher figshare collection journal article supplement (https://acs.figshare.com/ndownloader/files/24054294)
Supplement: Supplementary file 1 [file 24054294]

# Supporting Information

## Unlocking the impacts of COVID-19 Lockdowns: Changes in Thermal Electricity Generation Water Footprint and Virtual Water Trade in Europe

Mario Roidt<sup>a,b,c</sup>, Christopher M. Chini<sup>d</sup>, Ashlynn S. Stillwell<sup>e</sup>, Andrea Cominola<sup>f,b,\*</sup>

<sup>a</sup>*Chair of Smart Water Networks, Technische Universität Berlin, Berlin, Germany*

<sup>b</sup>*Einstein Center Digital Future, Berlin, Germany*

<sup>c</sup>*International Cooperation Division, Dorsch International Consultants GmbH, Munich, Germany  
(mario.roidt@dorsch.de)*

<sup>d</sup>*Department of Systems Engineering and Management, Air Force Institute of Technology, Wright-Patterson AFB, Ohio 45433, United States (christopher.chini@afit.edu)*

<sup>e</sup>*Department of Civil and Environmental Engineering, University of Illinois at Urbana-Champaign, Urbana, Illinois 61801, United States (ashlynn@illinois.edu)*

<sup>f</sup>*Chair of Smart Water Networks, Technische Universität Berlin, Berlin, Germany  
(andrea.cominola@tu-berlin.de)*

## Table of Contents

- Additional remarks on the methodology: temporal changes of water footprint and virtual water in Europe (Equations S1-S6).
- Table S1: Specific Water Consumption of thermal power plants.
- Table S2: Countries included/excluded from study.
- Table S3: Start dates of lockdown measures.
- Table S4: COVID-19 cases in Europe.
- Table S5: Changes in virtual water trade during lockdowns.
- Figure S1: Schematic representation for calculating temporal changes of water footprint and virtual water trade.
- Figure S2: Electricity, water footprint and virtual water for Italy.
- Figure S3: Electricity, water footprint and virtual water for Switzerland.
- Figure S4: Electricity, water footprint and virtual water for Germany.
- Figure S5: Electricity, water footprint and virtual water for Spain.
- Figure S6: Electricity, water footprint and virtual water for France.

### Additional remarks on the methodology: temporal changes of water footprint and virtual water in Europe

In this section, we describe the methodology that we implemented to quantify the temporal changes of water footprint (WF) and virtual water (VW) in Europe and for the five selected countries (Italy, Spain, France, Germany, and Switzerland) during the COVID-19 lockdowns. At the European level, we also disaggregate the portion of change possibly due to changes in electricity generation during the COVID-19 lockdowns, from the portion of change due to different electricity mix.

We applied the following methodology to the following variables of interest:

- 2020 time series of water footprint of electricity generation for Europe, DE, CH, IT, FR or ES
- 2020 time series of total virtual water imports to DE, CH, IT, FR or ES
- 2020 time series of total virtual water exports from DE, CH, IT, FR or ES

Given the time series of one of the analyzed variables of interest (V), (e.g., the 2020 time series of water footprint of electricity generation in Europe; see blue line in Figure S1), its average values in 2020 before and after the start of lockdown-like measures are compared to its average baseline values, i.e., the average values of the same variable V computed over the past four years (2016-2019). The average temporal change of the variable of interest (D in Equation S1 and Figure S1) is then calculated as a difference between the anomalies of its 2020 average values and the average 2016-2019 baseline values, before and after the lockdown-like measure start date.

$$D = (\overline{B_{bf}} - \overline{V_{bf}}) - (\overline{B_{af}} - \overline{V_{af}}) \quad (S1)$$

where  $\overline{V_{bf}}$  is the mean value of V before the lockdown-like measures,  $\overline{B_{bf}}$  is the mean value for the 2016-2019 baseline time series calculated over the same period of the year considered for  $\overline{V_{bf}}$ ,  $\overline{V_{af}}$  is the mean value of V after the lockdown-like measures, and  $\overline{B_{af}}$  is the mean value for the baseline calculated over the same period of the year of  $\overline{V_{af}}$ . D thus represents the temporal change of variable V that occurred during the lockdown. Given that it is calculated as a difference of two anomalies referred to the same baseline, we can assume that it is cleaned from the main seasonality and inter-annual changes in electricity mix between 2016 and 2020. The value of D for any variable shows the actual change of water footprint or virtual water trade in m<sup>3</sup>/day. Any relative value given as a percentage only indicates an order of magnitude that depends on the considered reference value; the true corrected value is subject to seasonal weather influences, considering that electricity generation and, therefore, also water footprints decrease in spring due to the warmer weather.<sup>1,2</sup> In this work, we considered the average between the 2016-19 and 2020 mean time series as baseline value. We applied Equation S1 for the calculation of the temporal change of the above-mentioned variables of interest both at the European level and for each of the selected countries.

For the analysis of the COVID-19 lockdown period at the European level, we also disaggregated the changes in the WF due to daily changes in the electricity mix, from the portion of change possibly due, to changes in electricity generation and demand. We chose a similar approach as Equation S1, where the changes due to a varying electricity mix are calculated as the difference between the variable of interest before the lockdown in 2020 and its 2016-2019 baseline. We modeled the changes due to electricity mix after the lockdown-like measures by comparison with a scenario where the electricity mix was fixed throughout the lockdown at the values from March 15, 2020. This analysis was implemented as follows and all variables are schematically represented in Figure S1:

- First, we shifted the variable of interest V by a term that takes into account seasonality and changes in electricity mix between 2016 and 2020 (as in Equation S1). The obtained shifted variable X (red line in Figure S1) is calculated as:

$$X = V + (\overline{B_{bf}} - \overline{V_{bf}}) \quad (S2)$$

- Second, we projected the shifted variable X to Y (green line in Figure S1). Y simulates X in the scenario where we fix the electricity mix during the lockdown to the date of the start of the lockdown (March 15, 2020). We therefore simulate the lockdown period assuming the same electricity mix each day, in order to disaggregate only the changes due to decreasing electricity generation in the lockdown period.
- Once X and Y are obtained and their average value is calculated for the lockdown period ( $\bar{X}_{af}$ ,  $\bar{Y}_{af}$ ), the two key variables  $d_1$  and  $d_2$  can be obtained, where  $d_1$  represents the average water footprint change due to changes in daily electricity mix and  $d_2$  represents the average change due to reduction in energy generation and is, thus, independent from changes in the electricity mix:

$$d_1 = \bar{Y}_{af} - \bar{X}_{af} \quad (S3)$$

$$d_2 = \bar{B}_{af} - \bar{Y}_{af} \quad (S4)$$

We can thus also conclude the following, considering the formulation of Equation S1 and approximation errors:

$$D \approx d_1 + d_2 \quad (S5)$$

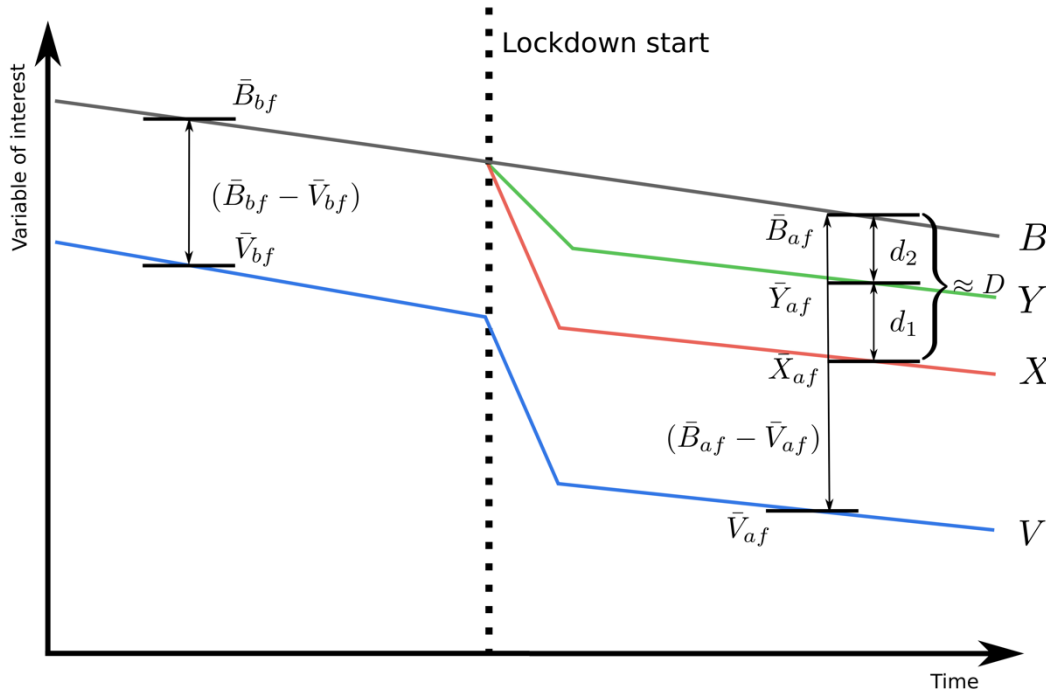

**Figure S1:** Schematic representation of the variable of interest (V, blue line), its Baseline (B, grey line), and all the variables formulated in the methodological section. This schematic representation is only provided for visualization purposes.

Finally, we calculated the water footprint of electricity load for DE, CH, IT, FR, and ES as:

$$WF_{electricity\ load} = WF_{electricity\ generation} + VW_{import} - VW_{export} \quad (S6)$$

**Table S1:** Specific water consumption ( $\text{m}^3/\text{MWh}$ ) for different electricity producing technologies and cooling water technologies based on<sup>3</sup> and described in<sup>4</sup>. The values were taken from the JRC-PPDB-OPEN and its average values were used in this study. For solar, the value 0 was used as the only deviation from the database. Photovoltaic solar panels require a negligible amount of water during operations. In the JRC-PPDB-OPEN<sup>5</sup> only 36 out of 278 (13%) of facilities consume water for cooling (all of them in Spain and probably all concentrated solar power). In this study we thus neglected the water footprint of solar.

|                                        | <b>Air Cooling</b> | <b>Mechanical Draught Tower</b> | <b>Natural Draught Tower</b> | <b>Once-through</b> | <b>Unknown</b> | <b>Average</b> |
|----------------------------------------|--------------------|---------------------------------|------------------------------|---------------------|----------------|----------------|
| <b>Biomass</b>                         | 0.13               | 2.09                            | 2.09                         | 1.14                | -              | <b>1.36</b>    |
| <b>Fossil Brown coal/Lignite</b>       | 0.22               | 1.81                            | 1.81/1.87                    | 0.95                | 2.06/0.16      | <b>1.27</b>    |
| <b>Fossil Coal derived gas</b>         | 0.1                | 3.13                            | 3.13                         | 0.38/0.91           | -              | <b>1.53</b>    |
| <b>Fossil Gas</b>                      | 0.01/0.1           | 0.78/3.13                       | 0.78/3.13                    | 0.38/0.91           | 0.78/0.91      | <b>1.09</b>    |
| <b>Fossil Hard coal</b>                | 0.22               | 1.81/1.87                       | 1.81/1.87                    | 0.39/0.95           | 2.06           | <b>1.37</b>    |
| <b>Fossil Oil</b>                      | 0.1                | 3.13                            | 3.13                         | 0.91                | -              | <b>1.82</b>    |
| <b>Fossil Oil shale</b>                | -                  | -                               | -                            | 0.95                | -              | <b>0.95</b>    |
| <b>Fossil Peat</b>                     | -                  | 1.81                            | 1.81                         | 0.95                | -              | <b>1.52</b>    |
| <b>Geothermal</b>                      | 0.02               | 0.06                            | 0.06                         | -                   | -              | <b>0.05</b>    |
| <b>Nuclear</b>                         | -                  | 2.54                            | 2.54                         | 1.02                | -              | <b>2.03</b>    |
| <b>Other</b>                           | 0.1                | 3.13                            | 3.13                         | 0.91                | -              | <b>1.82</b>    |
| <b>Waste</b>                           | 0.13               | 2.09                            | 2.09                         | 1.14                | -              | <b>1.36</b>    |
| <b>Solar</b>                           | -                  | -                               | -                            | 3.43                | -              | <b>0.00</b>    |
| <b>Wind Onshore</b>                    | -                  | -                               | -                            | -                   | -              | <b>0.00</b>    |
| <b>Wind Offshore</b>                   | -                  | -                               | -                            | -                   | -              | <b>0.00</b>    |
| <b>Other renewable</b>                 | -                  | -                               | -                            | -                   | -              | <b>0.00</b>    |
| <b>Marine</b>                          | -                  | -                               | -                            | -                   | -              | <b>0.00</b>    |
| <b>Hydro Water Reservoir</b>           | -                  | -                               | -                            | -                   | -              | <b>0.00</b>    |
| <b>Hydro Run-of-river and poundage</b> | -                  | -                               | -                            | -                   | -              | <b>0.00</b>    |
| <b>Hydro Pumped Storage</b>            | -                  | -                               | -                            | -                   | -              | <b>0.00</b>    |

**Table S2:** Countries included in/excluded from this study due to incomplete datasets for 2020.

| Country                | Code | Included |
|------------------------|------|----------|
| Albania                | AL   | No       |
| Austria                | AT   | Yes      |
| Belarus                | BY   | No       |
| Belgium                | BE   | Yes      |
| Bosnia and Herzegovina | BA   | Yes      |
| Bulgaria               | BG   | Yes      |
| Croatia                | HR   | No       |
| Czech Republic         | CZ   | Yes      |
| Denmark                | DK   | No       |
| Estonia                | EE   | Yes      |
| Finland                | FI   | Yes      |
| North Macedonia        | MK   | No       |
| France                 | FR   | Yes      |
| Germany                | DE   | Yes      |
| Greece                 | GR   | Yes      |
| Hungary                | HU   | Yes      |
| Ireland                | IE   | No       |
| Italy                  | IT   | Yes      |
| Latvia                 | LV   | Yes      |
| Lithuania              | LT   | Yes      |
| Luxembourg             | LU   | No       |
| Malta                  | MT   | No       |
| Montenegro             | ME   | No       |
| Netherlands            | NL   | Yes      |
| Norway                 | NO   | Yes      |
| Poland                 | PL   | Yes      |
| Portugal               | PT   | Yes      |
| Republic of Moldova    | MD   | No       |
| Romania                | RO   | Yes      |
| Serbia                 | RS   | Yes      |
| Slovakia               | SK   | No       |
| Slovenia               | SI   | Yes      |
| Spain                  | ES   | Yes      |
| Sweden                 | SE   | Yes      |
| Switzerland            | CH   | Yes      |
| United Kingdom         | UK   | Yes      |
| Ukraine                | UA   | No       |
| Cyprus                 | CY   | No       |

**Table S3:** Start date of measures against the COVID-19 pandemic in the selected five countries.

| Date                                | France                 | Germany                 | Switzerland             | Italy                  | Spain                   |
|-------------------------------------|------------------------|-------------------------|-------------------------|------------------------|-------------------------|
| <b>Precautionary Measures (PCM)</b> | 12-Mar-20 <sup>6</sup> | 15-Mar-20 <sup>7</sup>  | --                      | 20-Feb-20 <sup>8</sup> | --                      |
| <b>Lockdown Measures (LDM)</b>      | 24-Mar-20 <sup>9</sup> | 23-Mar-20 <sup>10</sup> | 16-Mar-20 <sup>11</sup> | 10-Mar-20 <sup>8</sup> | 16-Mar-20 <sup>12</sup> |

**Table S4:** COVID-19 cases and deaths in selected European countries as of March 15, 2020. The table is sorted by absolute cases, which was our basis for selecting the five top countries. The gray areas show the top five countries in the other categories.

| Country                | Absolute Cases <sup>6</sup> | Cases relative to population <sup>13,14</sup> | Absolute Deaths <sup>13</sup> |
|------------------------|-----------------------------|-----------------------------------------------|-------------------------------|
| Italy                  | <b>24747</b>                | <b>0.41‰</b>                                  | <b>6820</b>                   |
| Spain                  | <b>7798</b>                 | <b>0.17‰</b>                                  | <b>2808</b>                   |
| Germany                | <b>5795</b>                 | 0.07‰                                         | 157                           |
| France                 | <b>4499</b>                 | 0.07‰                                         | <b>1100</b>                   |
| Switzerland            | <b>2200</b>                 | <b>0.26‰</b>                                  | 122                           |
| Norway                 | 1221                        | <b>0.23‰</b>                                  | 12                            |
| United Kingdom         | 1140                        | 0.02‰                                         | <b>422</b>                    |
| Netherlands            | 1135                        | 0.07‰                                         | <b>276</b>                    |
| Sweden                 | 1022                        | 0.10‰                                         | 36                            |
| Belgium                | 886                         | 0.08‰                                         | 122                           |
| Austria                | 860                         | 0.10‰                                         | 28                            |
| Greece                 | 331                         | 0.03‰                                         | 20                            |
| Czech Republic         | 253                         | 0.02‰                                         | 3                             |
| Portugal               | 245                         | 0.02‰                                         | 33                            |
| Finland                | 244                         | 0.04‰                                         | 1                             |
| Slovenia               | 219                         | 0.11‰                                         | 4                             |
| Estonia                | 171                         | <b>0.13‰</b>                                  | 0                             |
| Ireland                | 129                         | 0.03‰                                         | 7                             |
| Poland                 | 119                         | 0.00‰                                         | 10                            |
| Slovakia               | 54                          | 0.01‰                                         | 0                             |
| Bulgaria               | 51                          | 0.01‰                                         | 3                             |
| Serbia                 | 48                          | 0.01‰                                         | 3                             |
| Hungary                | 32                          | 0.00‰                                         | 9                             |
| Bosnia and Herzegovina | 24                          | 0.01‰                                         | 3                             |
| Lithuania              | 12                          | 0.00‰                                         | 2                             |

**Table S5:** Changes in virtual water trade during lockdowns in 1000 m<sup>3</sup>/day.

|             | To IT | To CH | To DE | To ES | To FR | To other |
|-------------|-------|-------|-------|-------|-------|----------|
| From IT     | 0     | 2.6   | 0     | 0     | 0.2   | 0.8      |
| From CH     | -47.4 | 0     | 30.5  | 0     | -0.4  | 7.1      |
| From DE     | 0     | -0.6  | 0     | 0     | -2.1  | 0.5      |
| From ES     | 0     | 0     | 0     | 0     | 1.2   | 9.9      |
| From FR     | -22.8 | -1.5  | 16.2  | 9.6   | 0     | 1.5      |
| From Others | -0.5  | 0.2   | -6.4  | -3.9  | 11.5  | 0        |

## ITALY

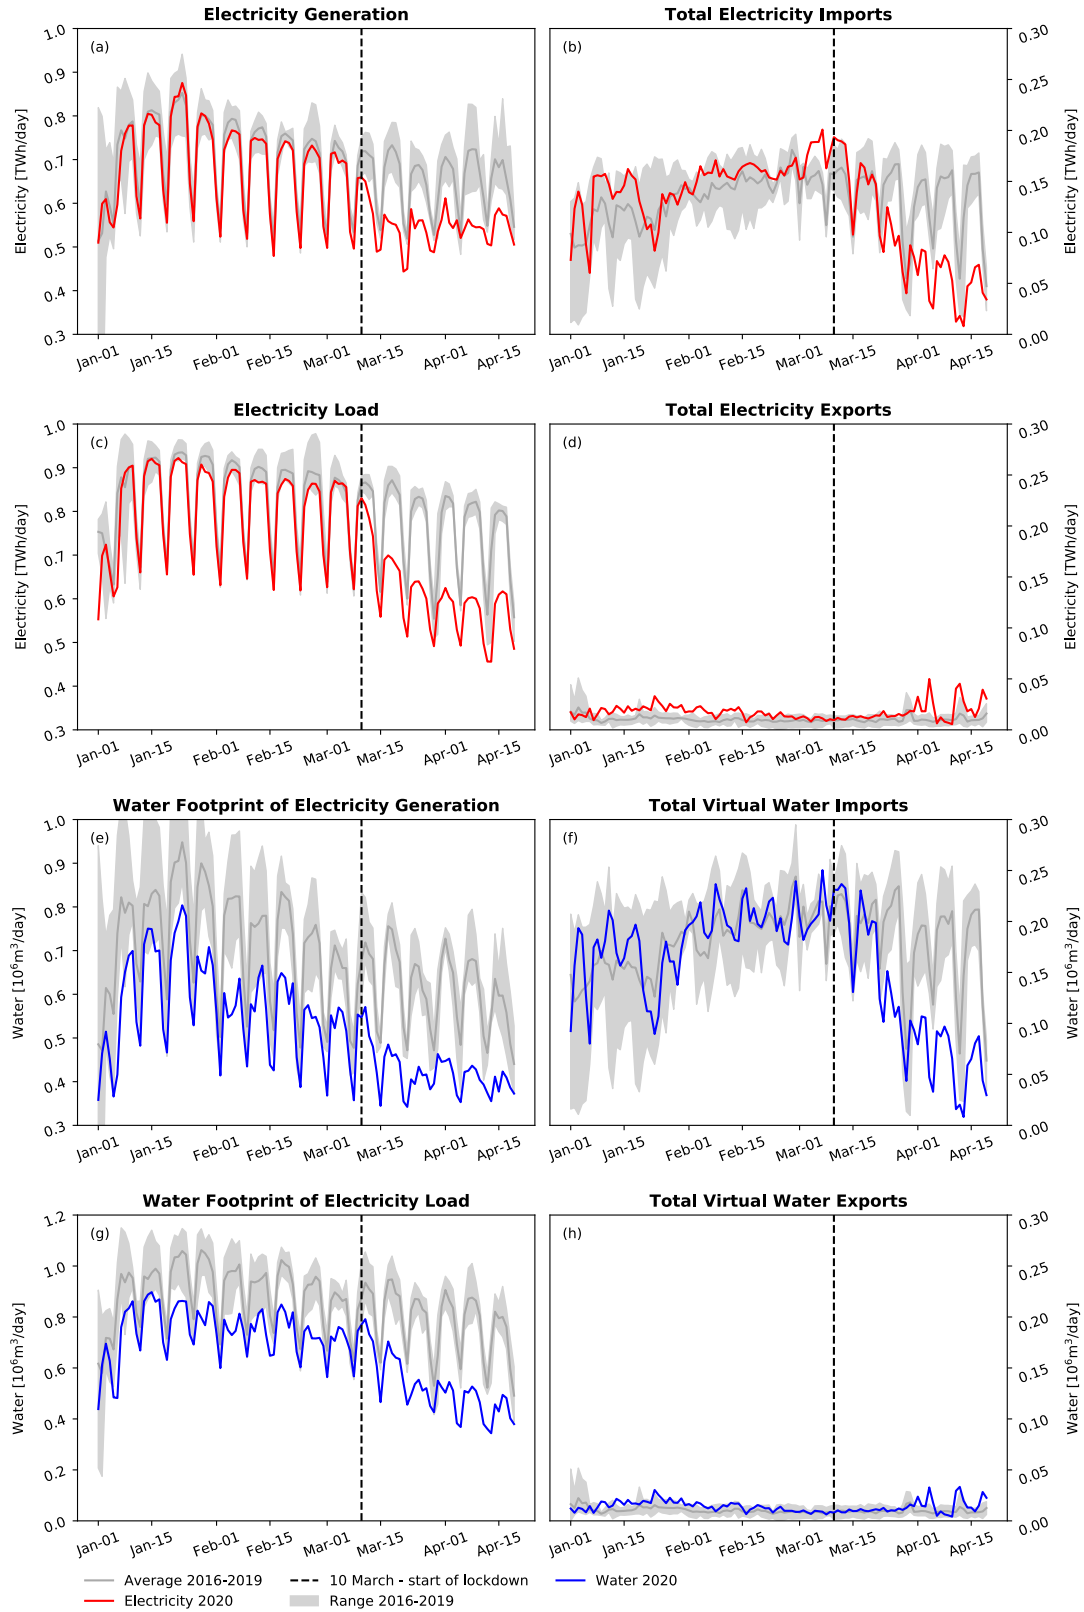

**Figure S2: ITALY.** Electricity generation, load, imports, and exports (red lines) and related Water Footprint and Virtual Water time series (blue lines) in Italy from January 1, 2020 to April 19, 2020. Time series are compared to their average values and minimum-maximum range since 2016 (gray line and shaded gray area). The dotted black line shows the start of the lockdown in Italy on March 10, 2020.



## SWITZERLAND

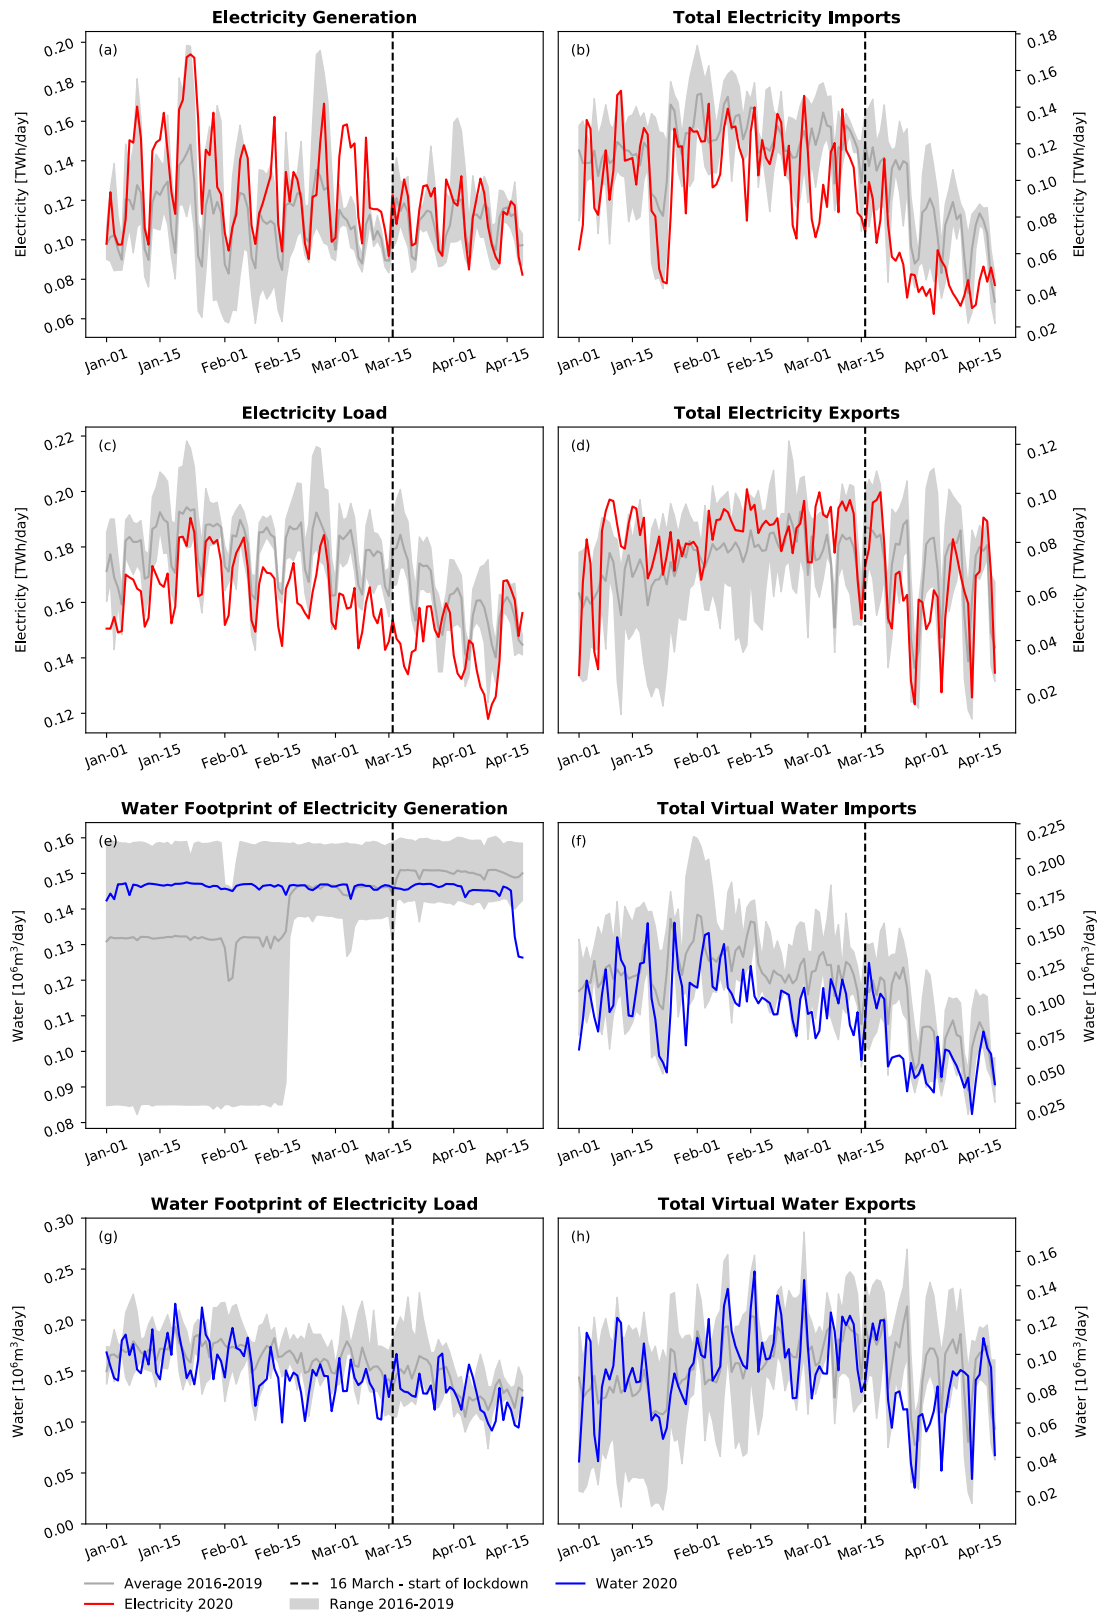

**Figure S3: SWITZERLAND.** Electricity generation, load, imports, and exports (red lines) and related Water Footprint and Virtual Water time series (blue lines) in Switzerland from January 1, 2020 to April 19, 2020. Time series are compared to their average values and minimum-maximum range since 2016 (gray line and shaded gray area). The dotted black line shows the start of the lockdown in Switzerland on March 16, 2020.

## GERMANY

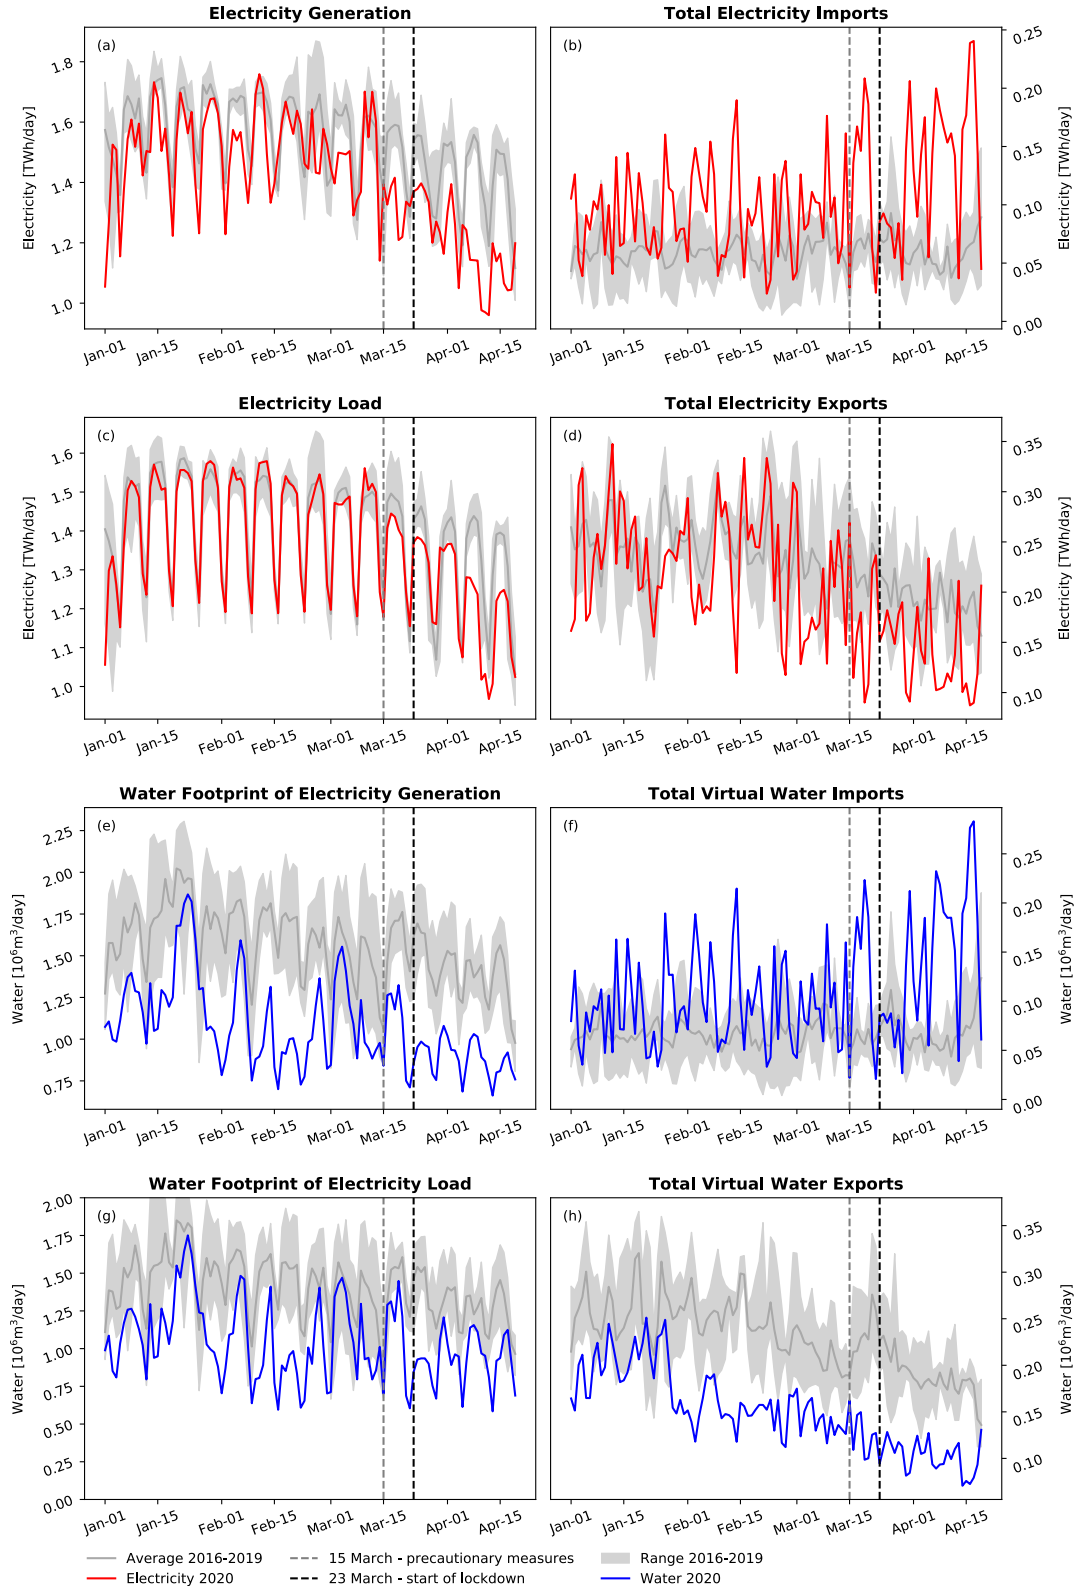

**Figure S4: GERMANY.** Electricity generation, load, imports, and exports (red lines) and related Water Footprint and Virtual Water time series (blue lines) in Germany from January 1, 2020 to April 19, 2020. Time series are compared to their average values and minimum-maximum range since 2016 (gray line and shaded gray area). The dotted gray line shows the start of preventive measures on March 15, 2020, and the dotted black line shows the start of the lockdown on March 23, 2020.

## SPAIN

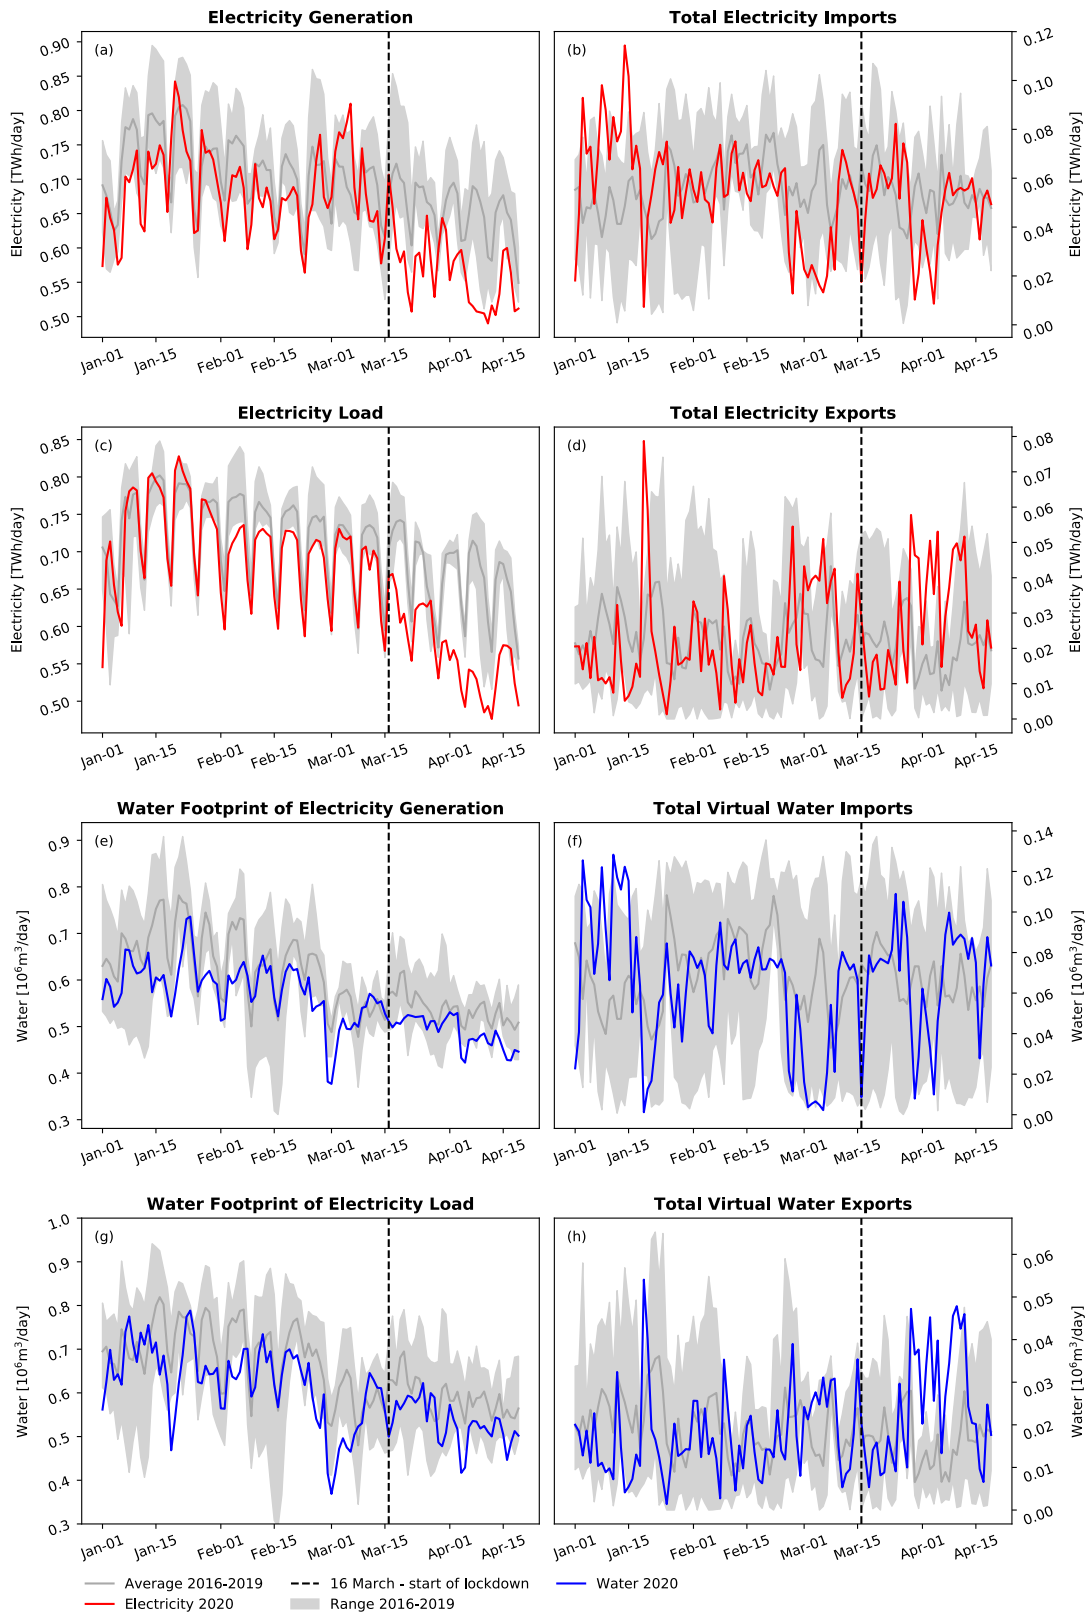

**Figure S5: SPAIN.** Electricity generation, load, imports, and exports (red lines) and related Water Footprint and Virtual Water time series (blue lines) in Spain from January 1, 2020 to April 19, 2020. Time series are compared to their average values and minimum-maximum range since 2016 (gray line and shaded gray area). The dotted black line shows the start of the lockdown Spain on March 16, 2020.

## FRANCE

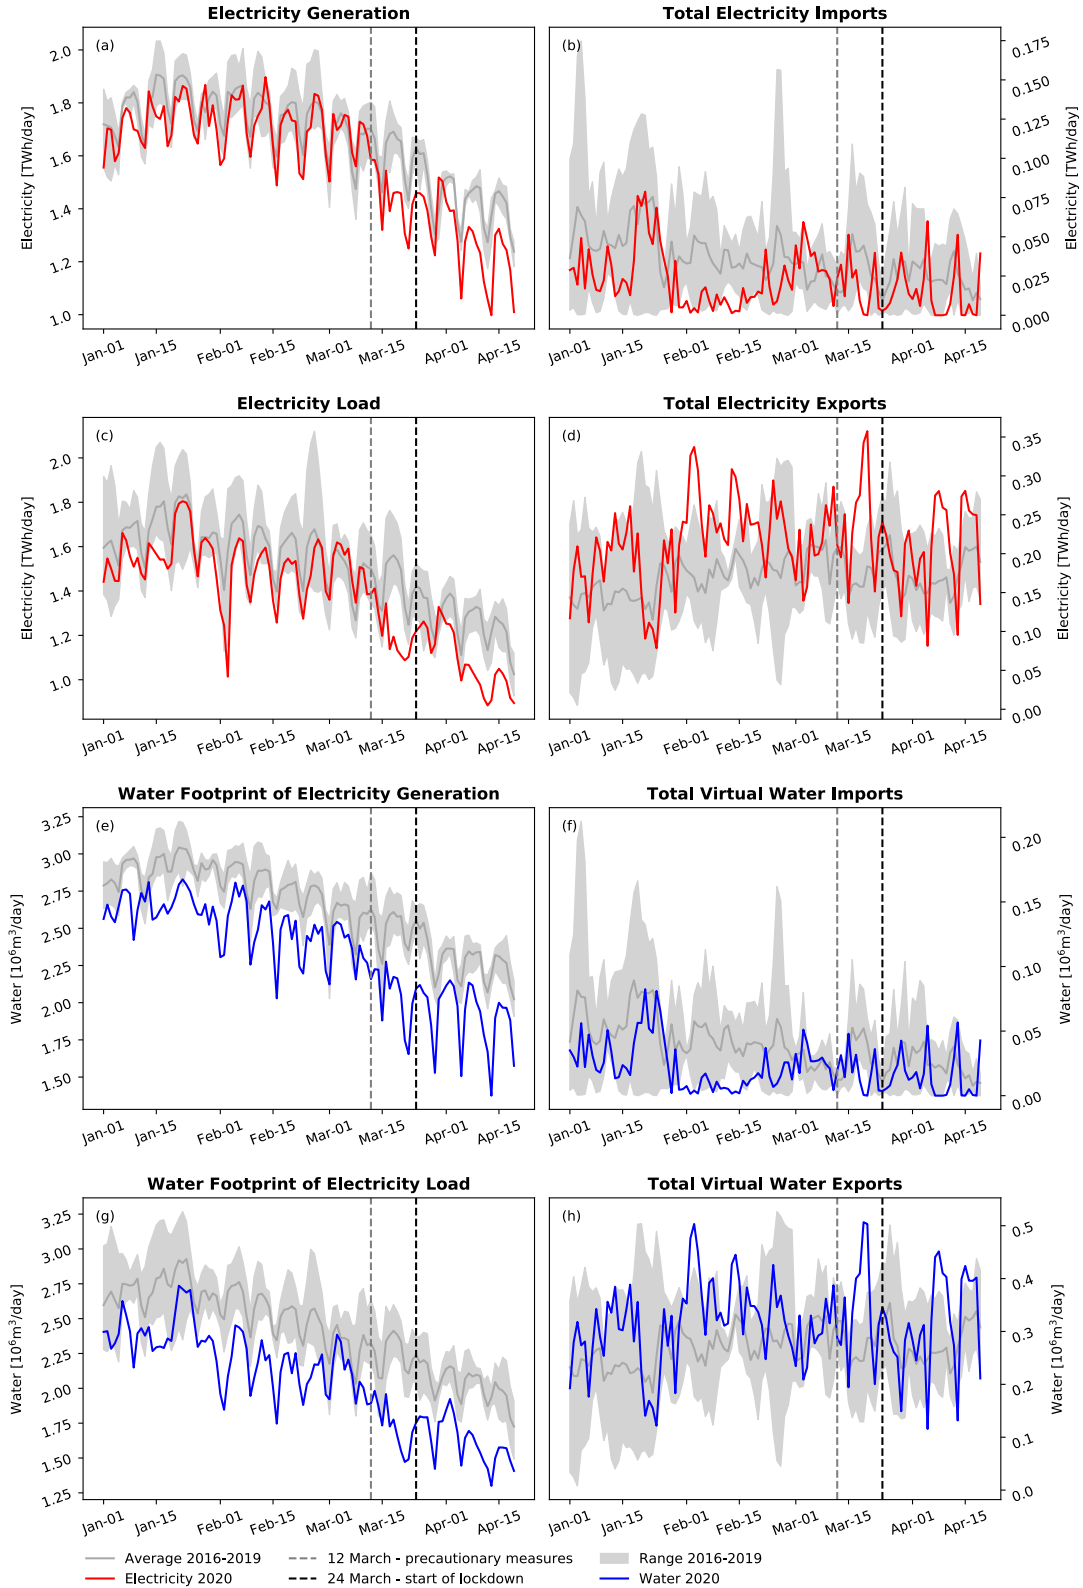

**Figure S6: FRANCE.** Electricity generation, load, imports, and exports (red lines) and related Water Footprint and Virtual Water time series (blue lines) in France from January 1, 2020 to April 19, 2020. Time series are compared to their average values and minimum-maximum range since 2016 (gray line and shaded gray area). The dotted gray line shows the start of preventive measures on March 10, 2020, and the dotted black line shows the start of the lockdown on March 24, 2020.

## References

- (1) Chini, C. M.; Stillwell, A. S. The Changing Virtual Water Trade Network of the European Electric Grid. *Applied Energy* **2020**, *260*, 114151. <https://doi.org/10.1016/j.apenergy.2019.114151>.
- (2) Gallo Cassarino, T.; Sharp, E.; Barrett, M. The Impact of Social and Weather Drivers on the Historical Electricity Demand in Europe. *Applied Energy* **2018**, *229*, 176–185. <https://doi.org/10.1016/j.apenergy.2018.07.108>.
- (3) Macknick, J.; Newmark, R.; Heath, G.; Hallett, K. C. Operational Water Consumption and Withdrawal Factors for Electricity Generating Technologies: A Review of Existing Literature. *Environ. Res. Lett.* **2012**, *7* (4), 045802. <https://doi.org/10.1088/1748-9326/7/4/045802>.
- (4) Hidalgo González, I.; Magagna, D.; Medarac, H.; European Commission; Joint Research Centre. *Projected Fresh Water Use from the European Energy Sector: Disaggregated Fresh Water Withdrawal and Consumption in the EU up to 2050*; 2018.
- (5) Kanellopoulos K.; De Felice M.; Hidalgo Gonzalez I.; Bocin A. JRC Open Power Plants Database (JRC-PPDB-OPEN). **2019**. <https://doi.org/10.5281/zenodo.3349843>.
- (6) Barbière, C. Coronavirus: Macron Announces Drastic Measures in France. *www.euractiv.com*, 2020.
- (7) Ernst, A.; Schulte von Drach, M. Coronavirus: Wie Sich Deutschland Gegen Das Virus Wehrt - Politik. *Süddeutsche Zeitung*. March 20, 2020.
- (8) Cicala, S. Is Plunging Power Demand Amid Coronavirus a Sign of Things to Come? *EPIC*, 2020.
- (9) The local. EXPLAINED: These Are the Rules of Lockdown in France. *The Local*. March 24, 2020.
- (10) RTL. Kontaktsperre Wegen Coronavirus: Treffen von Mehr Als Zwei Personen Ab Sofort Bundesweit Verboten. *RTL.de*. March 23, 2020.
- (11) Swissinfo. Coronavirus: Die Situation in Der Schweiz - SWI Swissinfo.Ch. April 24, 2020.
- (12) Keeley, G. Spain Imposes Italy-Style Lockdown in Bid to Contain Coronavirus. *Al Jazeera*. March 15, 2020.
- (13) JHU. COVID-19 Map - Johns Hopkins Coronavirus Resource Center <https://coronavirus.jhu.edu/map.html> (accessed Apr 24, 2020).
- (14) Worldometer. European Countries by Population (2020) <https://www.worldometers.info/population/countries-in-europe-by-population/> (accessed May 5, 2020).
